# Supplementary material for: Organically-modified magnesium silicate nanocomposites for high-performance heavy metal removal
Source: Royal Society of Chemistry journal article supplement (doi:10.1039/c6ra20181d), 2016-01-01
Supplement: c6ra20181d1.pdf [file c6ra20181d1.pdf]

## Supplementary Material

### Organically-modified magnesium silicate nanocomposites for high-performance heavy metals removal

Yichang Yu<sup>a</sup>, Zhangjun Hu,<sup>a,b,\*</sup> Zhenyong Chen<sup>a</sup>, Jiayang Yang,<sup>c\*</sup> Zhiwen Chen,<sup>b</sup> Hongwen Gao<sup>a</sup>

<sup>a</sup> State Key Laboratory of Pollution Control and Resource Reuse, College of Environmental Science and Engineering, Tongji University, Shanghai 200092, PR China

<sup>b</sup> School of Environmental and Chemical Engineering, Shanghai University, Shanghai, 200444, PR China

<sup>c</sup> Key Laboratory of Functional Inorganic Materials of Anhui Province, Anhui University, Hefei 230039, PR China.

\*Corresponding authors

Email: [huzjun@tongji.edu.cn](mailto:huzjun@tongji.edu.cn) (Z. Hu); [jxyang@ahu.edu.cn](mailto:jxyang@ahu.edu.cn) (J. Yang)

Figure S1-S3 and Table S1

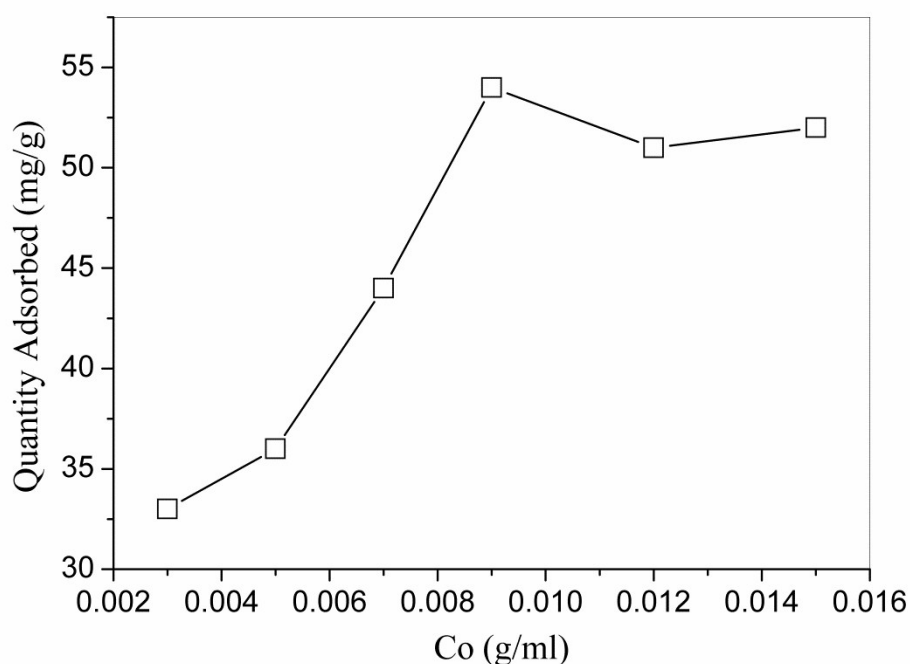

Fig. S1 Effect of PES dosage on the adsorption of Hg<sup>2+</sup>

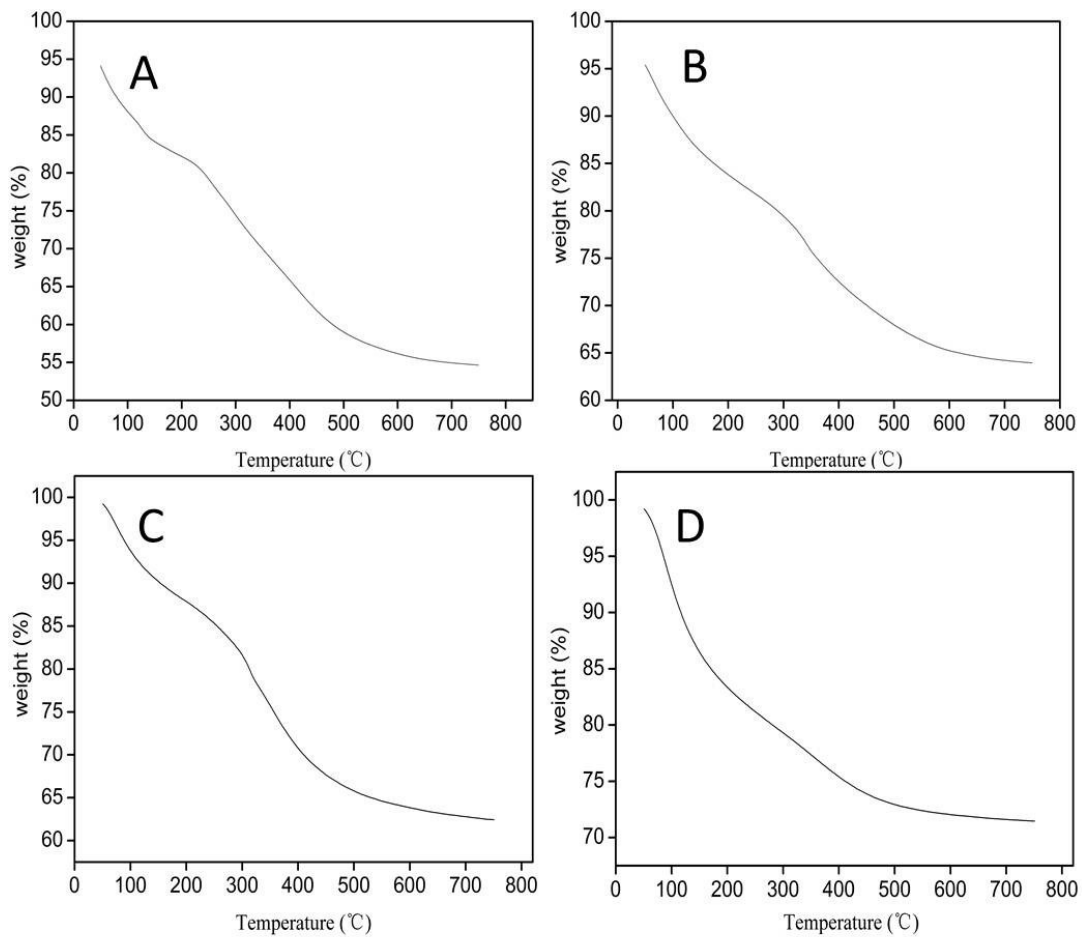

Fig. S2 The thermal gravimetric analysis of PES@Mg<sub>2</sub>SiO<sub>4</sub> (A), PEI@Mg<sub>2</sub>SiO<sub>4</sub>-CS<sub>2</sub> (B), PEI@Mg<sub>2</sub>SiO<sub>4</sub> (C) and Mg<sub>2</sub>SiO<sub>4</sub> (D)

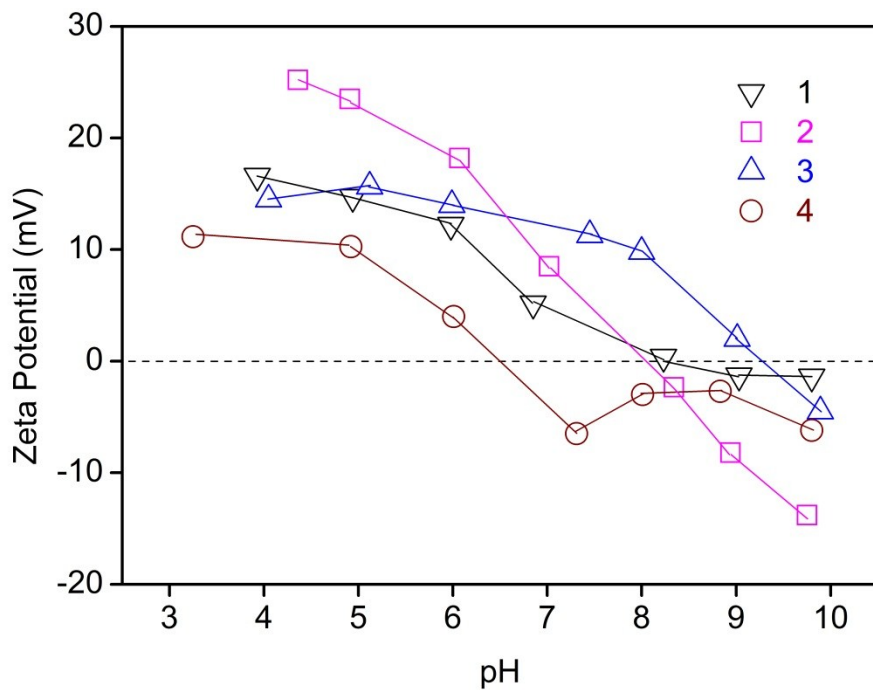

Fig. S3 zeta potential of PES@Mg<sub>2</sub>SiO<sub>4</sub> (1), PEI@Mg<sub>2</sub>SiO<sub>4</sub>-CS<sub>2</sub> (2), PEI@Mg<sub>2</sub>SiO<sub>4</sub> (3) and Mg<sub>2</sub>SiO<sub>4</sub> (4)

Table S1 Selective adsorption property of Hg<sup>2+</sup>, Pb<sup>2+</sup> and Cd<sup>2+</sup>

|                                    | metal            | Adsorption capacity(mmol/g) | Selective coefficient         |
|------------------------------------|------------------|-----------------------------|-------------------------------|
| Hg <sup>2+</sup> -Pb <sup>2+</sup> | Hg <sup>2+</sup> | 0.2066                      | $\alpha_{Hg^{2+}/Pb^{2+}}=2$  |
|                                    | Pb <sup>2+</sup> | 0.0824                      | .51                           |
| Hg <sup>2+</sup> -Cd <sup>2+</sup> | Hg <sup>2+</sup> | 0.2050                      | $\alpha_{Hg^{2+}/Cd^{2+}}=3$  |
|                                    | Cd <sup>2+</sup> | 0.0615                      | .33                           |
| Pb <sup>2+</sup> -Cd <sup>2+</sup> | Pb <sup>2+</sup> | 0.1073                      | $\alpha_{Pb^{2+}/Cd^{2+}}=1.$ |
|                                    | Cd <sup>2+</sup> | 0.0815                      | 32                            |
